# Supplementary material
Source: PubMed Central journal article supplement (PMC7860232)
Supplement: ao0c05748_si_001.pdf [file ao0c05748_si_001.pdf]

# Supporting Information

## **Characterization of different phosphorus forms in flooded and upland paddy soils incubated with various manure**

Guang-Lei Chen,<sup>a,b,1</sup> Liang Xiao,<sup>a,1</sup> Qiu-Lin Xia,<sup>a</sup> Yu Wang,<sup>b</sup> Jia-Hui Yuan,<sup>b</sup> Hao Chen,<sup>b</sup> Shen-Qiang Wang,<sup>b\*</sup> Yi-Yong Zhu<sup>a\*</sup>

<sup>a</sup> Jiangsu Collaborative Innovation Center for Solid Organic Waste Resource Utilization, College of Resources and Environmental Science, Nanjing Agricultural University, Nanjing, 210095, China

<sup>b</sup> State Key Laboratory of Soil and Sustainable Agriculture, Changshu National Agro-Ecosystem Observation and Research Station, Institute of Soil Science, Chinese Academy of Sciences, Nanjing 210008, China

Email: [yiyong1973@njau.edu.cn](mailto:yiyong1973@njau.edu.cn) & [sqwang@issas.ac.cn](mailto:sqwang@issas.ac.cn)

**Number of text pages: 6**

**Number of tables: 3**

**Number of figures: 2**

## Tables

**Table S1** The application rates of animal manure adopted in soil culture experiment

| Treatment | Application rate | Flooded condition            | Upland condition             |
|-----------|------------------|------------------------------|------------------------------|
|           |                  | Manure (t ha <sup>-1</sup> ) | Manure (t ha <sup>-1</sup> ) |
| CK        | --               | 0                            | 0                            |
| PM        | LP               | 1.70                         | 1.70                         |
|           | MP               | 3.41                         | 3.41                         |
|           | HP               | 5.68                         | 5.68                         |
| CM        | LP               | 1.70                         | 1.70                         |
|           | MP               | 3.40                         | 3.40                         |
|           | HP               | 5.67                         | 5.67                         |
| DM        | LP               | 2.58                         | 2.58                         |
|           | MP               | 5.15                         | 5.15                         |
|           | HP               | 8.58                         | 8.58                         |
| OM        | LP               | 1.82                         | 1.82                         |
|           | MP               | 3.64                         | 3.64                         |
|           | HP               | 6.06                         | 6.06                         |

PM, pig manure; CM, chicken manure; DM, dairy manure; OM, commercial organic compost. LP, 60 kg P<sub>2</sub>O<sub>5</sub> ha<sup>-1</sup>; MP, 120 kg P<sub>2</sub>O<sub>5</sub> ha<sup>-1</sup>; HP, 200 kg P<sub>2</sub>O<sub>5</sub> ha<sup>-1</sup>.

**Table S2** Experimentally determined parameters of the exponential equation of the release of water-extractable P (Y) and time (t) in animal manure

| Treatment | Nonlinear equations            | $Y_0$ (mg kg <sup>-1</sup> ) | $k$ (mg kg <sup>-1</sup> h <sup>-1</sup> ) | $R^2$ | WEP/TP (%) |
|-----------|--------------------------------|------------------------------|--------------------------------------------|-------|------------|
| PM        | $Y_t = 2843 - 2097e^{-0.076t}$ | 2843 ± 21.5                  | 0.0759                                     | 0.986 | 20.5       |
| CM        | $Y_t = 2797 - 1709e^{-0.016t}$ | 2497 ± 305                   | 0.0164                                     | 0.912 | 16.2       |
| DM        | $Y_t = 18.39 - 6.84e^{-0.45t}$ | 18.39 ± 0.284                | 0.4505                                     | 0.715 | 0.32       |
| OM        | $Y_t = 4215 - 1756e^{-0.57t}$  | 4215 ± 22.5                  | 0.5714                                     | 0.887 | 31.6       |

$Y_t = Y_0 + A e^{-kt}$ .  $Y_t$ , Release amount of rapidly soluble nutrient in unit time of unit mass sample.  $Y_0$ , The maximum amount of soluble nutrient content per unit mass of soil.  $k$ , the release rate constant.  $R^2$  = coefficient of determination. PM, pig manure; CM, chicken manure; DM, dairy manure; OM, commercial organic compost.

**Table S3** Experimentally determined parameters of the exponential equation of the release rate of Olsen-P ( $Y$ ) and incubation time in soil culture experiment with different animal manures

| Treatment | Flooded condition            |                                            |        | upland condition             |                                            |         |          |
|-----------|------------------------------|--------------------------------------------|--------|------------------------------|--------------------------------------------|---------|----------|
|           | $Y_0$ (mg kg <sup>-1</sup> ) | $k$ (mg kg <sup>-1</sup> d <sup>-1</sup> ) | $R^2$  | $Y_0$ (mg kg <sup>-1</sup> ) | $k$ (mg kg <sup>-1</sup> d <sup>-1</sup> ) | $R^2$   |          |
| PM        | CK                           | 30.4                                       | 0.0302 | 0.800                        | 26.9                                       | 0.1215  | 0.350    |
|           | LP                           | 30.9                                       | 0.3460 | 0.706                        | 31.9                                       | 0.1080  | 0.530    |
|           | MP                           | 34.2                                       | 0.0893 | 0.863                        | 35.3                                       | 0.7692  | 0.919    |
|           | HP                           | 35.0                                       | 1.7544 | 0.910                        | 39.3                                       | 1.5060  | 0.987    |
| CM        | CK                           | 30.4                                       | 0.0302 | 0.800                        | 26.9                                       | 0.1215  | 0.350    |
|           | LP                           | 28.5                                       | 0.0714 | 0.661                        | 31.2                                       | 0.2137  | 0.863    |
|           | MP                           | 31.7                                       | 0.0746 | 0.669                        | 35.9                                       | 0.0469  | 0.784    |
|           | HP                           | 35.0                                       | 0.1063 | 0.824                        | 36.9                                       | 0.3876  | 0.890    |
| DM        | CK                           | 30.4                                       | 0.0302 | 0.800                        | 26.9                                       | 0.1215  | 0.350    |
|           | LP                           | 30.0                                       | 0.0472 | 0.643                        | 27.6                                       | 0.1572  | 0.805    |
|           | MP                           | 33.3                                       | 0.0694 | 0.565                        | 30.7                                       | 0.1786  | 0.593    |
|           | HP                           | 32.7                                       | 0.0549 | 0.869                        | 29.7                                       | 0.3559  | 0.780    |
| OM        | CK                           | 30.4                                       | 0.0302 | 0.800                        | 26.9                                       | 0.1215  | 0.350    |
|           | LP                           | 30.2                                       | 0.2591 | 0.558                        | 29.8                                       | 0.1965  | 0.797    |
|           | MP                           | 35.8                                       | 0.0709 | 0.928                        | 34.4                                       | 0.9709  | 0.929    |
|           | HP                           | 36.8                                       | 0.0629 | 0.934                        | 36.2                                       | 45.4545 | 0.848 ns |

$Y_t = Y_0 + A e^{-kt}$ .  $Y_t$ , Release amount of rapidly soluble nutrient in unit time of unit mass sample.  $Y_0$ , The maximum amount of soluble nutrient content per unit mass of soil.  $k$ , the release rate constant.  $R^2$  = coefficient of determination. LP, 60 kg P<sub>2</sub>O<sub>5</sub> ha<sup>-1</sup>; MP, 120 kg P<sub>2</sub>O<sub>5</sub> ha<sup>-1</sup>; HP, 200 kg P<sub>2</sub>O<sub>5</sub> ha<sup>-1</sup>. PM, pig manure; CM, chicken manure; DM, dairy manure; OM, commercial organic compost. Ns, Fitting was not convergent.

## Figures

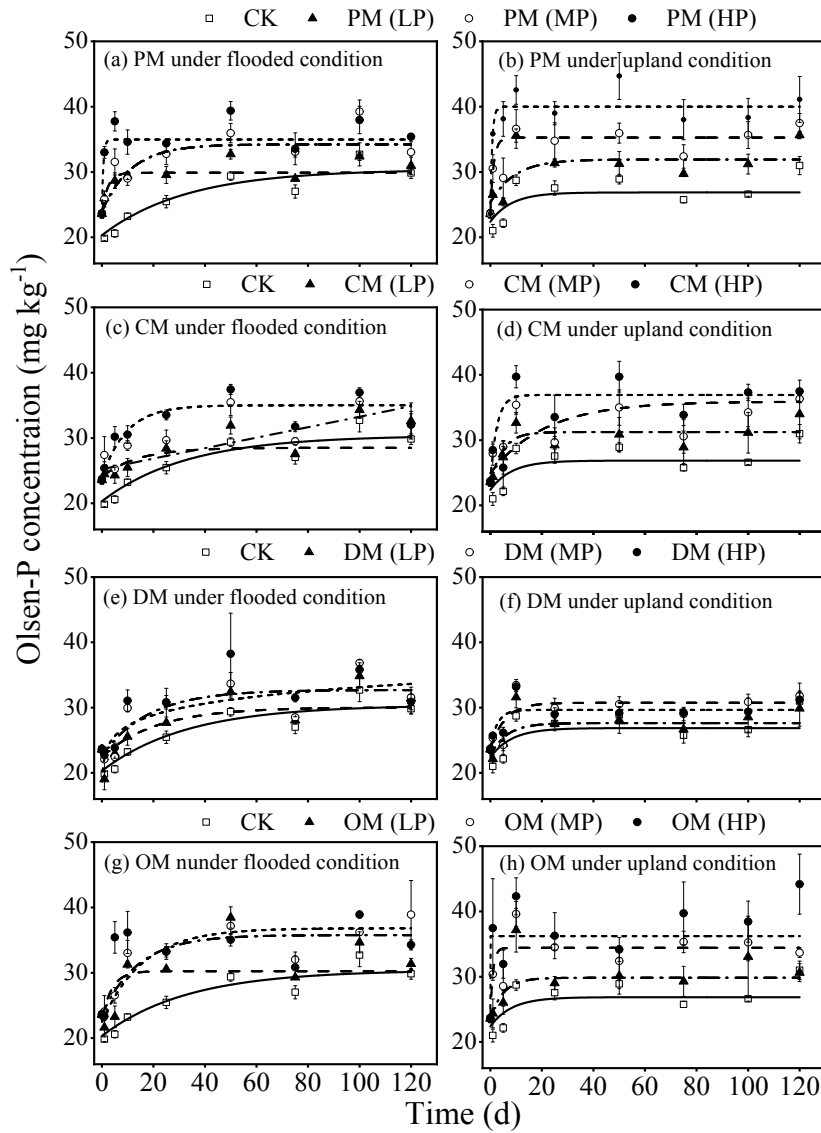

**Figure S1** Dynamic change of Olsen-P in soil treated with different release proportions of animal manures in flooded and upland soils. The changes of Olsen-P in PM, CM, DM, and OM under flooded (a, c, e, g), and PM, CM, DM, and OM under upland (b, d, f, h) conditions, respectively. PM, pig manure; CM, chicken manure; DM, dairy manure; OM, commercial organic compost. The error bar ( $n = 3$ ) represents the standard deviation

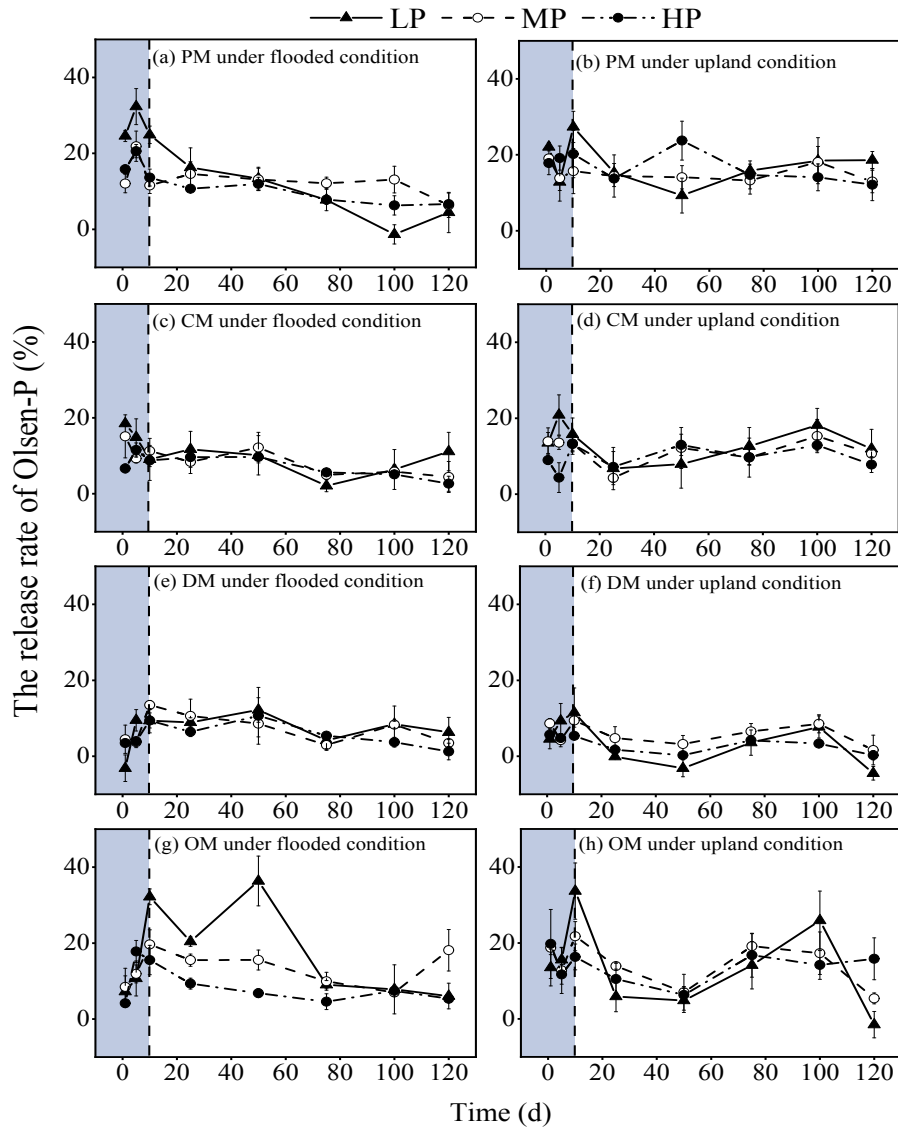

**Figure S2** The release rate of Olsen-P under different animal manure levels under flooded and upland conditions. Release effect of the PM, CM, DM, and OM under flooded (a, c, e, g), and PM, CM, DM, and OM under upland (b, d, f, h) conditions with LP, MP, and HP, respectively. PM, pig manure; CM, chicken manure; DM, dairy manure; OM, commercial organic compost. LM, The error bar (n = 3) represents the standard deviation.
